# Supplementary material
Source: publisher site journal article supplement (https://www.dovepress.com/article/578433)
Supplement: Supplementary file 1 [file 578433_Supplementary%20Materials.docx]

**Supplementary Table 1. Baseline demographic and clinical characteristics of the patients with SFTS in the training cohort and validation cohort**

| **Parameters** | **Total  (n=650)** | **Training cohort**  **(n=455)** | **Validation cohort**  **(n=195)** | P-value |
| --- | --- | --- | --- | --- |
| Age | 66.00(59.00-73.00) | 66.00(59.00-73.00) | 66.00(59.00-73.00) | 0.844 |
| Male,n(%) | 290(44.6) | 201(44.2) | 89(45.6) | 0.731 |
| Time from onset to admission, days | 5.00(4.00-7.00) | 5.00(4.00-7.00) | 5.00(4.00-7.00) | 0.482 |
| Hospitalization, days | 9.00(7.00-12.25) | 9.00(7.00-13.00) | 9.00(7.00-12.00) | 0.762 |
| Course of disease, days | 15.00(12.00-19.00) | 15.00(12.00-19.00) | 15.00(12.00-18.00) | 0.845 |
| Survival | 572(88.0) | 397(87.3) | 175(89.7) | 0.371 |
| Death | 78(12.0) | 58(12.7) | 20(10.3) | 0.371 |
| **History, n (%)** |  |  |  |  |
| Hypertensive disease | 175(26.9) | 124(27.3) | 51(26.2) | 0.772 |
| Diabetes | 109(16.8) | 81(17.8) | 28(14.4) | 0.282 |
| Coronary heart disease | 36(5.5) | 25(5.5) | 11(5.6) | 0.940 |
| respiratory diseases | 64(9.8) | 49(10.8) | 15(7.1) | 0.228 |
| Arrhythmia | 11(1.7) | 7(1.5) | 4(2.1) | 0.894 |
| Cerebral infarction | 32(4.9) | 24(5.3) | 8(4.1) | 0.527 |
| Liver diseases | 12(1.8) | 7(1.5) | 5(2.6) | 0.567 |
| Tumor | 13(2.0) | 10(2.2) | 3(1.5) | 0.807 |
| Kidney diseases | 7(1.1) | 5(1.1) | 2(1.0) | 1.000 |
| **Symptoms and Signs, n (%)** |  |  |  |  |
| Fever | 609(93.7) | 426(93.6) | 183(93.8) | 0.916 |
| Chills | 275(42.3) | 193(42.4) | 82(42.1) | 0.931 |
| Weak | 549(84.5) | 390(85.7) | 159(81.5) | 0.178 |
| Headache | 82(12.6) | 58(12.7) | 24(12.3) | 0.877 |
| Dizziness | 175(26.9) | 126(27.7) | 49(25.1) | 0.499 |
| Cough | 111(17.1) | 79(17.4) | 32(16.4) | 0.767 |
| Cough with sputum | 75(11.5) | 54(11.9) | 21(10.8) | 0.688 |
| Chest distress | 23(3.5) | 16(3.5) | 7(3.6) | 0.963 |
| Palpitation | 7(1.1) | 6(1.3) | 1(0.5) | 0.619 |
| Muscular soreness | 251(38.6) | 185(40.7) | 66(33.8) | 0.102 |
| Arthralgia | 207(31.8) | 149(32.7) | 58(29.7) | 0.451 |
| Oliguria | 10(1.5) | 5(1.1) | 5(2.6) | 0.297 |
| Inappetence | 524(80.6) | 371(81.5) | 153(78.5) | 0.363 |
| Nausea | 320(49.2) | 222(48.8) | 98(50.3) | 0.732 |
| Vomiting | 177(27.2) | 124(27.3) | 53(27.2) | 0.985 |
| Bloating | 16(2.5) | 13(2.9) | 3(1.5) | 0.473 |
| Abdominal pain | 74(11.4) | 50(11.0) | 24(12.3) | 0.628 |
| Diarrhea | 221(34.0) | 159(34.9) | 62(31.8) | 0.437 |
| Hemorrhage | 30(4.6) | 21(4.6) | 9(4.6) | 1.000 |
| Pharyngeal hyperemia | 31(4.8) | 25(5.5) | 6(3.1) | 0.185 |
| Breath rough | 142(21.8) | 103(22.6) | 39(20.0) | 0.456 |
| Lymphadenectasis | 171(26.3) | 117(25.7) | 54(27.7) | 0.600 |
| Abdominal Tenderness | 71(10.9) | 46(10.1) | 25(12.8) | 0.310 |
| Neurological manifestations | 139(21.4) | 104(22.9) | 35(17.9) | 0.162 |
| **Laboratory tests** |  |  |  |  |
| WBC(109/L) | 2.35(1.60-3.61) | 2.35(1.61-3.62) | 2.37(1.59-3.61) | 0.993 |
| Neutrophils(×109/L) | 1.39(0.88-2.37) | 1.40(0.91-2.30) | 1.33(0.83-2.52) | 0.692 |
| NEU(%) | 65.20(51.70-76.50) | 65.80(51.60-76.00) | 64.50(51.70-78.60) | 0.928 |
| Lymphocytes (×109/L) | 0.56(0.35-0.91) | 0.55(0.35-0.91) | 0.58(0.35-0.93) | 0.758 |
| LYM(%) | 29.40(18.98-47.03) | 29.50(19.00-46.40) | 28.70(18.80-48.60) | 0.981 |
| NLR | 2.63(1.54-4.52) | 2.66(1.50-4.47) | 2.54(1.55-4.67) | 0.831 |
| PWR | 29.80(16.84-44.06) | 29.28(17.16-45.22) | 30.48(16.62-41.94) | 0.693 |
| CAR | 0.88(0.31-2.65) | 0.93(0.33-2.65) | 0.69(0.24-2.85) | 0.101 |
| CLR | 4.94(1.50-17.45) | 5.30(1.65-17.47) | 3.39(1.19-17.20) | 0.126 |
| Monocytes (×109/L) | 0.18(0.09-0.40) | 0.18(0.09-0.40) | 0.19(0.08-0.39) | 0.815 |
| MON(%) | 7.30(4.38-12.23) | 7.30(4.40-12.40) | 7.30(4.20-12.10) | 0.749 |
| Eosinophils(×109/L) | 0.00(0.00-0.01) | 0.00(0.00-0.01) | 0.00(0.00-0.01) | 0.086 |
| EOS(%) | 0.20(0.00-0.40) | 0.10(0.00-0.30) | 0.20(0.00-0.40) | 0.751 |
| Basophils(×109/L) | 0.00(0.00-0.01) | 0.00(0.00-0.01) | 0.00(0.00-0.01) | 0.820 |
| BASO% | 0.20(0.00-0.30) | 0.20(0.00-0.30) | 0.20(0.00-0.40) | 0.784 |
| RBC(×109/L) | 4.58(4.23-4.95) | 4.54(4.23-4.94) | 4.62(4.26-4.97) | 0.325 |
| HGB(g/L) | 139.00(127.00-151.00) | 139.00(128.00-151.00) | 140.00(126.00-151.00) | 0.813 |
| RDW(%) | 12.40(11.90-12.90) | 12.40(11.90-13.00) | 12.40(12.00-12.90) | 0.983 |
| RAR | 3.84(3.46-4.34) | 3.83(3.47-4.41) | 3.84(3.43-4.26) | 0.628 |
| PLT(×109/L) | 67.00(50.00-87.00) | 68.00(51.00-87.00) | 66.00(49.00-89.00) | 0.562 |
| CK(U/L) | 346.00(169.00-956.00) | 343.00(162.00-955.00) | 359.00(180.00-965.00) | 0.606 |
| LDH(U/L) | 496.00(326.00-830.50) | 498.00(320.00-848.00) | 470.00(343.00-812.00) | 0.935 |
| CK-MB(ng/ml) | 9.00(4.63-16.00) | 9.00(4.81-17.00) | 8.42(4.21-16.00) | 0.519 |
| ALT(U/L) | 60.60(38.18-107.93) | 60.60(39.40-107.90) | 60.60(35.20-109.10) | 0.991 |
| AST(U/L) | 115.30(64.68-219.95) | 115.30(62.80-223.80) | 115.30(66.80-218.10) | 0.842 |
| TBIL(umol/L) | 9.54(7.65-12.41) | 9.38(7.60-12.50) | 9.93(8.06-12.38) | 0.201 |
| DBIL(umol/L) | 2.86(2.17-4.22) | 2.82(2.16-4.22) | 2.99(2.20-4.22) | 0.648 |
| ALB(g/dL) | 3.23(2.91-3.56) | 3.21(2.90-3.56) | 3.27(2.99-3.57) | 0.598 |
| GGT(U/L) | 26.50(18.00-48.00) | 27.00(18.00-48.00) | 26.00(18.00-48.00) | 0.323 |
| ALP(U/L) | 62.00(50.78-79.00) | 63.00(51.00-79.50) | 58.20(50.40-77.30) | 0.272 |
| K+(mmol/L) | 3.70(3.40-4.00) | 3.70(3.40-4.00) | 3.70(3.40-4.00) | 0.184 |
| Na+(mmol/L) | 136.00(133.00-139.00) | 136.00(132.90-138.00) | 136.40(134.00-139.00) | **0.011** |
| Ca2+(mmol/L) | 1.94(1.83-2.04) | 1.94(1.83-2.03) | 1.94(1.83-2.05) | 0.662 |
| PCT(ng/ml) | 0.15(0.08-0.32) | 0.15(0.08-0.31) | 0.14(0.08-0.35) | 0.609 |
| CRP(mg/L) | 2.69(1.01-8.54) | 2.77(1.10-8.57) | 2.25(0.82-8.41) | 0.103 |
| BUN(mmol/L) | 5.69(4.23-7.87) | 5.64(4.23-7.78) | 6.17(4.22-8.21) | 0.410 |
| CREA(umol/L) | 65.00(51.00-79.00) | 64.00(51.00-78.00) | 68.00(52.00-84.00) | **0.023** |
| D-Dimer(ug/ml) | 2.30(1.45-3.34) | 2.30(1.49-3.33) | 2.30(1.40-3.67) | 0.479 |
| TT(s) | 21.00(19.20-24.33) | 21.00(19.10-24.20) | 21.20(19.70-24.70) | 0.156 |
| APTT(s) | 46.30(40.58-52.73) | 46.30(41.00-52.90) | 45.90(40.30-52.10) | 0.531 |
| PT(s) | 12.90(12.30-13.60) | 12.90(12.20-13.60) | 12.90(12.30-13.60) | 0.890 |
| Fibrinogen(g/L) | 2.63(2.27-3.00) | 2.63(2.27-3.01) | 2.60(2.24-2.98) | 0.622 |
| Viral load (lg copies/mL) | 5.58(4.64-6.64) | 5.67(4.76-6.72) | 5.41(4.49-6.42) | 0.075 |

Abbreviations: SFTS: severe fever with thrombocytopenia syndrome, WBC: white blood cell, NEU: neutrophil, LYM: lymphocyte, NLR: neutrophil-to-lymphocyte ratio, PWR: platelet-to-white blood cell ratio, CAR: C-reactive protein-to-albumin ratio, CLR: C - reactive protein-to-lymphocyte ratio, MON: monocyte, EOS: eosinophils, BASO: basophils, RBC: red blood cell, HGB: hemoglobin, RDW: red blood cell distribution width, RAR: red cell distribution width to albumin ratio, PLT: platelet, CK: creatine phosphokinase, LDH: lactate dehydrogenase, CK-MB: creatine kinase myocardial band, ALT: alanine aminotransaminase, AST: aspartate aminotransferase, TBIL: total bilirubin, DBIL: direct bilirubin, ALB: albumin, GGT: γ-glutamyl transferase, ALP: alkaline, phosphatase, K: potassium, Na: sodium, Ca: calcium, PCT：procalcitonin, CRP：C-reactive protein, BUN：blood urea nitrogen, CREA：creatinine, TT：thrombin Time, APTT: activated partial thromboplastin time, PT: prothrombin time. Continuous variable data are presented as median (interquartile ranges, IQR). *P* values comparing the group of training cohort and validation cohort. Boldface *P* values indicate statistical significance at *P* < 0.05.

**Supplementary Table 2. Univariate cox regression analysis of parameters predictive of SFTS mortality in the training cohort**

| **Parameters** | **OR** | **95%** CI | ***P***-value |
| --- | --- | --- | --- |
| Age | 1.063 | (1.033-1.094) | **<0.001** |
| Male,n(%) | 0.966 | (0.576-1.621) | 0.896 |
| Time from onset to admission, days | 0.910 | (0.822-1.006) | **0.066** |
| **History, n (%)** |  |  |  |
| Hypertensive disease | 0.775 | (0.418-1.437) | 0.419 |
| Diabetes | 1.391 | (0.750-2.581) | 0.295 |
| Coronary heart disease | 0.887 | (0.278-2.838) | 0.840 |
| respiratory disease | 0.430 | (0.135-1.375) | 0.155 |
| Cerebral infarction | 0.683 | (0.167-2.800) | 0.596 |
| Liver disease | 0.921 | (0.127-6.666) | 0.935 |
| Tumor related history | 0.048 | (0.000-83.421) | 0.425 |
| Kidney disease | 1.608 | (0.222-11.634) | 0.638 |
| arrhythmia | 1.183 | (0.164-8.555) | 0.867 |
| **Symptoms and Signs, n (%)** |  |  |  |
| Fever | 0.863 | (0.321-2.385) | 0.776 |
| Chills | 0.755 | (0.442-1.290) | 0.304 |
| Weak | 0.470 | (0.253-0.874) | **0.017** |
| Headache | 0.757 | (0.325-1.764) | 0.519 |
| Dizziness | 0.649 | (0.344-1.226) | 0.183 |
| Cough | 0.871 | (0.428-1.774) | 0.704 |
| Cough with sputum | 0.882 | (0.379-2.053) | 0.770 |
| Chest distress | 0.937 | (0.228-3.845) | 0.928 |
| Palpitation | 0.049 | (0.000-538.697) | 0.524 |
| Muscular soreness | 0.631 | (0.348-1.080) | **0.090** |
| Arthralgia | 0.600 | (0.324-1.113) | 0.105 |
| Oliguria | 1.265 | (0.174-9.182) | 0.816 |
| Inappetence | 0.355 | (0.207-0.607) | **<0.001** |
| Nausea | 0.840 | (0.501-1.410) | 0.509 |
| Vomiting | 0.978 | (0.550-1.740) | 0.940 |
| Bloating | 0.573 | (0.079-4.142) | 0.581 |
| Abdominal pain | 0.568 | (0.206-1.569) | 0.275 |
| Diarrhea | 1.527 | (0.911-2.561) | 0.108 |
| Hemorrhage | 5.426 | (2.740-10.747) | **<0.001** |
| Pharyngeal hyperemia | 0.252 | (0.035-1.822) | 0.172 |
| Breath rough | 2.658 | (1.583-4.464) | **<0.001** |
| Lymphadenectasis | 0.783 | (0.414-1.482) | 0.453 |
| Abdominal Tenderness | 1.209 | (0.548-2.669) | 0.638 |
| Neurological manifestations | 3.208 | (1.915-5.375) | **<0.001** |
| **Laboratory tests** |  |  |  |
| WBC(×109/L) | 1.080 | (0.980-1.191) | 0.122 |
| Neutrophils(×109/L) | 1.111 | (1.000-1.235) | **0.051** |
| NEU(%) | 1.027 | (1.009-1.045) | **0.003** |
| Lymphocytes (×109/L) | 0.703 | (0.389-1.272) | 0.244 |
| LYM(%) | 0.973 | (0.958-0.989) | **0.001** |
| Monocytes (×109/L) | 0.913 | (0.495-1.684) | 0.770 |
| MON(%) | 0.979 | (0.943-1.016) | 0.254 |
| Eosinophils(×109/L) | 0.082 | (0.000-4954.845) | 0.656 |
| EOS(%) | 1.053 | (0.504-2.202) | 0.890 |
| Basophils(×109/L) | 0.000 | (0.000-1902.421) | 0.129 |
| BASO(%) | 0.316 | (0.091-1.093) | **0.069** |
| RBC(×109/L) | 0.743 | (0.461-1.198) | 0.223 |
| HGB(g/L) | 0.116 | (0.976-1.003) | 0.989 |
| RDW(%) | 1.385 | (1.203-1.594) | **<0.001** |
| PLT(×109/L) | 0.973 | (0.961-0.985) | **<0.001** |
| RAR | 2.065 | (1.744-2.444) | **<0.001** |
| NLR | 1.055 | (1.005-1.108) | **0.031** |
| PWR | 0.984 | (0.970-0.998) | **0.028** |
| CAR | 1.027 | (1.012-1.042) | **<0.001** |
| CLR | 1.005 | (1.003-1.008) | **<0.001** |
| CK(U/L) | 1.000 | (1.000-1.000) | **<0.001** |
| LDH(U/L) | 1.001 | (1.001-1.001) | **<0.001** |
| CK-MB(ng/ml) | 1.003 | (0.996-1.010) | 0.402 |
| ALT(U/L) | 1.002 | (1.001-1.004) | **0.003** |
| AST(U/L) | 1.002 | (1.001-1.002) | **<0.001** |
| TBIL(umol/L) | 1.025 | (1.006-1.044) | **0.010** |
| DBIL(umol/L) | 1.050 | (1.026-1.074) | **<0.001** |
| ALB(g/L) | 0.133 | (0.082-0.215) | **<0.001** |
| GGT(U/L) | 1.000 | (0.997-1.002) | 0.881 |
| ALP(U/L) | 1.000 | (0.998-1.001) | 0.762 |
| K+(mmol/L) | 1.591 | (0.904-2.800) | 0.107 |
| Na+(mmol/L) | 1.052 | (0.989-1.119) | 0.106 |
| Ca2+(mmol/L) | 0.971 | (0.841-1.120) | 0.685 |
| PCT(ng/ml) | 1.042 | (1.022-1.062) | **<0.001** |
| CRP(mg/L) | 1.009 | (1.003-1.016) | **0.003** |
| UREA(mmol/L) | 1.009 | (1.006-1.012) | **<0.001** |
| CREA(umol/L) | 1.005 | (1.003-1.007) | **<0.001** |
| D-Dimer(ug/ml) | 1.092 | (1.066-1.119) | **<0.001** |
| TT(s) | 1.020 | (1.014-1.027) | **<0.001** |
| APTT(s) | 1.033 | (1.024-1.042) | **<0.001** |
| PT(s) | 1.201 | (1.114-1.294) | **<0.001** |
| Fibrinogen(g/L) | 1.033 | (0.976-1.094) | 0.266 |
| Viral load (lg copies/mL) | 1.966 | (1.629-2.374) | **<0.001** |

Abbreviations: SFTS: severe fever with thrombocytopenia syndrome, WBC: white blood cell, NEU: neutrophil, LYM: lymphocyte, NLR: neutrophil-to-lymphocyte ratio, PWR: platelet-to-white blood cell ratio, CAR: C-reactive protein-to-albumin ratio, CLR: C-reactive protein-to-lymphocyte ratio, MON: monocyte, EOS: eosinophils, BASO: basophils, RBC: red blood cell, HGB: hemoglobin, RDW: red blood cell distribution width, RAR: red cell distribution width to albumin ratio, PLT: platelet, CK: creatine phosphokinase, LDH: lactate dehydrogenase, CK-MB: creatine kinase myocardial band, ALT: alanine aminotransaminase, AST: aspartate aminotransferase, TBIL: total bilirubin, DBIL: direct bilirubin, ALB: albumin, GGT: γ-glutamyl transferase, ALP: alkaline, phosphatase, K: potassium, Na: sodium, Ca: calcium, PCT：procalcitonin, CRP：C-reactive protein, BUN：blood urea nitrogen, CREA：creatinine, TT：thrombin Time, APTT: activated partial thromboplastin time, PT: prothrombin time. Boldface *P* values indicate statistical significance at *P* < 0.1.

**Supplementary Table 3. Lasso regression analysis of parameters predictive of SFTS mortality in the training cohort**

| Variable | Coefficient |
| --- | --- |
| Neurological manifestations | 0.097 |
| RAR | 0.466 |
| AST | 0.0002 |
| APTT | 0.012 |
| Viral load | 0.043 |

Note: The study identified variables with non-zero coefficients at log(λ) = lambda 1-SE.
Abbreviations: SFTS: severe fever with thrombocytopenia syndrome, Lasso: Least absolute shrinkage and selection operator, RAR: red cell distribution width to albumin ratio, AST: aspartate aminotransferase, APTT: activated partial thromboplastin time.
